# Supplementary material for: Household costs of dengue illness: secondary outcomes from a randomised controlled trial of dengue prevention in Guerrero state, Mexico
Source: PubMed Central journal article supplement (PMC5506602; doi:10.1186/s12889-017-4304-x), 2017-05-30
Supplement: 12889_2017_4304_MOESM1_ESM.pdf [file 12889_2017_4304_MOESM1_ESM.pdf]

**Additional File 1. Table S1. Estimates of direct and indirect costs of dengue illness cases in the previous year, in intervention and control sites, reported in the follow up survey**

|                                                 | Intervention sites (population 22,616) |                    |                     |                    | Control sites (population 21,410) |                    |                     |                    |
|-------------------------------------------------|----------------------------------------|--------------------|---------------------|--------------------|-----------------------------------|--------------------|---------------------|--------------------|
| <b>A. Ambulatory patients</b>                   |                                        |                    |                     |                    |                                   |                    |                     |                    |
| <i>1. Direct Costs</i>                          |                                        |                    |                     |                    |                                   |                    |                     |                    |
|                                                 | Mean cost<br>per case                  | Total No.<br>cases | No. cases /<br>1000 | Cost /1000         | Mean cost<br>per case             | Total No.<br>cases | No. cases /<br>1000 | Cost /1000         |
| Consultation                                    | 10.6                                   | 151                | 6.68                | <b>70.8</b>        | 15.6                              | 197                | 9.20                | <b>143.5</b>       |
| Medicines                                       | 28.5                                   | 219                | 9.68                | <b>276.0</b>       | 26.5                              | 292                | 13.63               | <b>361.4</b>       |
| Transport                                       | 7.3                                    | 220                | 9.73                | <b>71.0</b>        | 8.5                               | 268                | 12.52               | <b>106.4</b>       |
| <i>2. Indirect Costs</i>                        |                                        |                    |                     |                    |                                   |                    |                     |                    |
|                                                 | Mean days<br>per case                  | Total No.<br>cases | No. cases /<br>1000 | Days lost<br>/1000 | Mean days<br>per case             | Total No.<br>cases | No. cases /<br>1000 | Days lost<br>/1000 |
| School or work days lost by<br>the patient      | 8.5                                    | 377                | 16.67               | <b>141.7</b>       | 7.7                               | 458                | 21.39               | <b>164.7</b>       |
| School or work days lost by<br>the caregiver(s) | 8.2                                    | 310                | 13.71               | <b>112.4</b>       | 7.7                               | 372                | 17.38               | <b>133.8</b>       |
| <b>B. Hospitalized patients</b>                 |                                        |                    |                     |                    |                                   |                    |                     |                    |
| <i>1. Direct costs</i>                          |                                        |                    |                     |                    |                                   |                    |                     |                    |
|                                                 | Mean cost<br>per case                  | Total No.<br>cases | No. cases /<br>1000 | Cost /1000         | Mean cost<br>per case             | Total No.<br>cases | No. cases /<br>1000 | Cost /1000         |
| Consultation                                    | 41                                     | 16                 | 0.70                | <b>28.7</b>        | 32                                | 22                 | 1.02                | <b>32.64</b>       |
| Medicines                                       | 98                                     | 19                 | 0.84                | <b>82.3</b>        | 78                                | 44                 | 2.05                | <b>159.90</b>      |
| Transport                                       | 19.3                                   | 46                 | 2.03                | <b>39.2</b>        | 19                                | 67                 | 3.12                | <b>59.28</b>       |
| <i>2. Indirect costs</i>                        |                                        |                    |                     |                    |                                   |                    |                     |                    |
|                                                 | Mean days<br>per case                  | Total No.<br>cases | No. cases /<br>1000 | Days lost<br>/1000 | Mean days<br>per case             | Total No.<br>cases | No. cases /<br>1000 | Days lost<br>/1000 |
| School or work days lost by<br>the patient      | 14                                     | 44                 | 1.94                | <b>27.16</b>       | 12                                | 69                 | 3.22                | <b>38.64</b>       |
| School or work days lost by<br>the caregiver(s) | 15                                     | 43                 | 1.90                | <b>28.50</b>       | 10                                | 78                 | 3.64                | <b>36.40</b>       |
